# Supplementary material for: Assembly of complete diploid-phased chromosomes from draft genome sequences
Source: PubMed Central journal article supplement (PMC9339290; doi:10.1093/g3journal/jkac143), 2022-06-10

*M. rotundifolia* Chromosome 02 - Haplotype 1

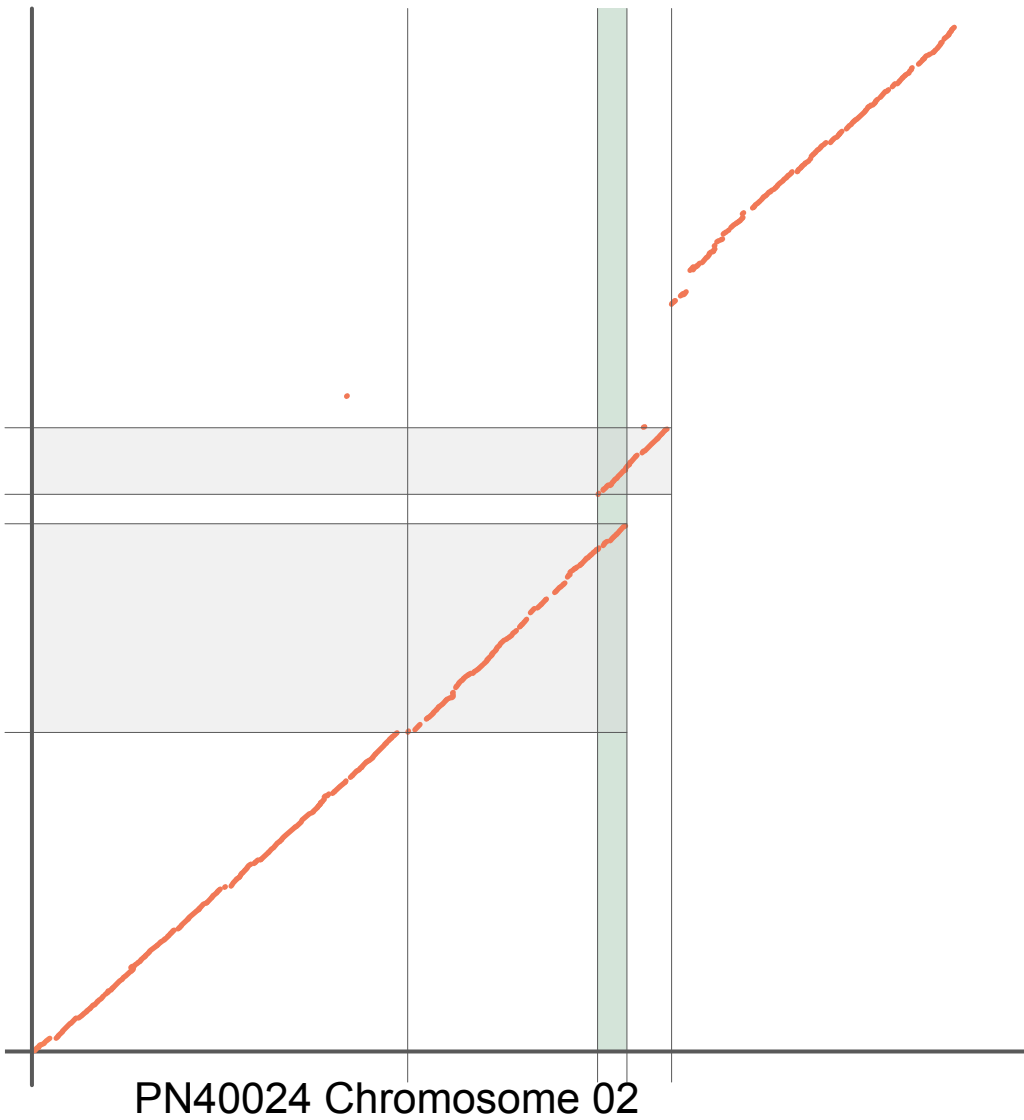

Supplement: jkac143_supplementary_figure_5.pdf [file jkac143_supplementary_figure_5.pdf]
